# Supplementary material for: Differences in Clinical and Dietary Characteristics, Serum Adipokine Levels, and Metabolomic Profiles between Early- and Late-Onset Gout
Source: MDPI journal article supplement (doi:10.3390/metabo11060399), 2021-06-18
Supplement: s1 [file s1]

## SUPPLEMENTARY MATERIALS

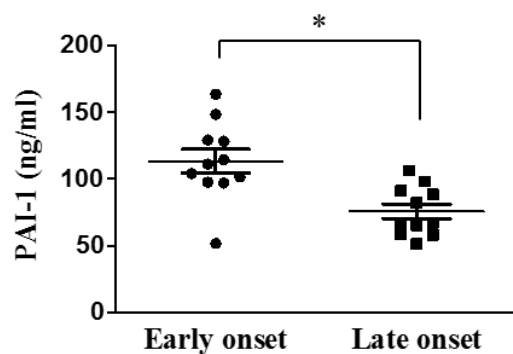

**Figure S1.** Comparison of PAI-1 concentrations according to age of onset (n=11 in each group, \*p<0.005)

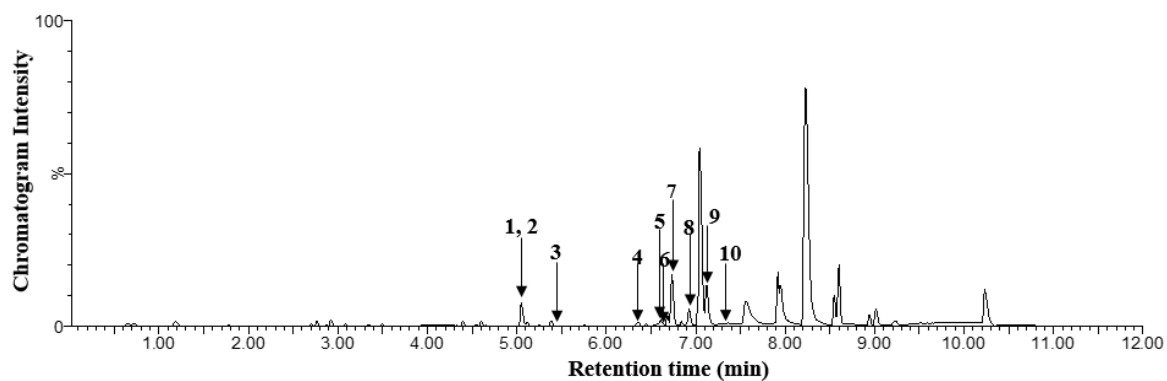

**Figure S2.** Base peak intensity chromatograms of plasma metabolic profiles in a serum sample based on ultra-performance liquid chromatography coupled with quadrupole time-of-flight mass spectrometry analysis. 1, vanillin-iso-butyrate; 2, propylparaben/4-propoxybenzoic acid; 3, acylcarnitine analog/[2-(dioctylamino)-2-oxoethoxy]acetic acid; 4, LPC (20:5); 5, LPC (22:6)+Na; 6, LPE (22:6); 7, LPC (22:5); 8, LPC (22:6); 9, LPE (16:0); 10, LPC (18:0)

**Table S3.** Identification of major metabolites contributing to separation among the sample groups.

| No. | RT (min) | Compound                                                                | Exact mass<br>(M+H) | MS Fragments  | VIP  | <i>p</i> -value |
|-----|----------|-------------------------------------------------------------------------|---------------------|---------------|------|-----------------|
| 1   | 5.03     | vanillinis-iso-butyrate                                                 | 223.0948            | 181           | 1.05 | 0.001           |
| 2   | 5.04     | Propylparaben / 4-propoxybenzoic acid                                   | 181.0846            | 163           | 1.08 | 0.002           |
| 3   | 5.45     | Acylcarnitine analogue /<br>[2-(Diocetyl amino)-2-oxoethoxy]acetic acid | 358.2934            | 282           | 1.13 | 0.001           |
| 4   | 6.34     | LPC(20:5)                                                               | 542.3241            | 184, 104      | 1.27 | 0.000           |
| 5   | 6.59     | LPC(22:6)+Na                                                            | 590.3211            | 385, 550      | 0.85 | 0.013           |
| 6   | 6.62     | LPE(22:6)                                                               | 526.2926            | 385           | 0.89 | 0.008           |
| 7   | 6.74     | LPC(22:5)                                                               | 570.3548            | 104, 387, 552 | 0.73 | 0.042           |
| 8   | 6.89     | LPC(22:6)                                                               | 568.3364            | 550, 383      | 0.77 | 0.036           |
| 9   | 7.08     | LPE(16:0)                                                               | 454.2917            | 436           | 0.81 | 0.027           |
| 10  | 7.31     | LPC(18:0)                                                               | 508.3750            | 184           | 0.78 | 0.030           |
